# Supplementary material
Source: ML conference proceedings conference paper supplement (https://proceedings.mlr.press/v48/wangb16.html)
Supplement: Supplementary file 1 [file wangb16-supp.pdf]

# The Knowledge Gradient for Sequential Decision Making with Stochastic Binary Feedbacks

This note contains supplementary materials to *The Knowledge Gradient for Sequential Decision Making with Stochastic Binary Feedbacks*.

## A Proofs of theoretical statements

We provide detailed proofs of Lemma 1 and Theorem 1 in this section.

### A.1 Proof of Lemma 1

**Lemma 1** Let  $\pi \in \Pi$  be a policy, and  $\mathbf{x}^\pi = \arg \max_{\mathbf{x}} \Pr[y = +1 | \mathbf{x}, \mathcal{D}^N]$  be the implementation decision after the budget  $N$  is exhausted. Then

$$\mathbb{E}[\Pr(y = +1 | \mathbf{x}^\pi, \mathbf{w})] = \mathbb{E}[\max_{\mathbf{x}} \Pr(y = +1 | \mathbf{x}, \mathcal{D}^N)],$$

where the expectation is taking over the prior distribution of  $\mathbf{w}$ .

*Proof.* First notice that for any fixed point  $\mathbf{x}$ ,

$$\begin{aligned} \mathbb{E}_N[\Pr(y = +1 | \mathbf{x}, \mathbf{w})] &= \mathbb{E}_N[\sigma(\mathbf{w}^T \mathbf{x})] \\ &= \int \sigma(\mathbf{w}^T \mathbf{x}) \Pr(\mathbf{w} | \mathcal{D}^N) d\mathbf{w} \\ &= \Pr(y = +1 | \mathbf{x}, \mathcal{D}^N). \end{aligned}$$

By the tower property of conditional expectations, and since  $\mathbf{x}^\pi$  is  $\mathcal{F}^N$  measurable,

$$\begin{aligned} \mathbb{E}[\Pr(y = +1 | \mathbf{x}^\pi, \mathbf{w})] &= \mathbb{E}[\sigma(\mathbf{w}^T \mathbf{x}^\pi)] \\ &= \mathbb{E} \mathbb{E}_N[\sigma(\mathbf{w}^T \mathbf{x}^\pi)] \\ &= \mathbb{E}[\Pr(y = +1 | \mathbf{x}^\pi, \mathcal{D}^N)]. \end{aligned}$$

Then by the definition of  $\mathbf{x}^\pi$ , we have  $\Pr(y = +1 | \mathbf{x}^\pi, \mathcal{D}^N) = \max_{\mathbf{x}} \Pr[y = +1 | \mathbf{x}, \mathcal{D}^N]$ .  $\square$

### A.2 Proof of Theorem 1

**Theorem 1** Let  $\mathcal{D}^n$  be the  $n$  measurements produced by the KG policy and  $\mathbf{w}^n = \arg \max_{\mathbf{w}} \Psi(\mathbf{w} | \mathbf{m}^0, \Sigma^0)$  with the prior distribution  $\Pr(\mathbf{w}^*) = \mathcal{N}(\mathbf{w}^* | \mathbf{m}^0, \Sigma^0)$ . Then with probability  $P_d(M)$ , the expected error of  $\mathbf{w}^n$  is bounded as

$$\mathbb{E}_{\mathbf{y} \sim \mathcal{B}(\mathcal{D}^n, \mathbf{w}^*)} \|\mathbf{w}^n - \mathbf{w}^*\|_2 \leq \frac{C_{min} + \lambda_{min}(\Sigma^{-1})}{2},$$

where the distribution  $\mathcal{B}(\mathcal{D}^n, \mathbf{w}^*)$  is the vector on Bernoulli distribution with  $\Pr(y^i = +1) = \sigma(\mathbf{w}^{*T} \mathbf{x}^i)$  of each dimension,  $P_d(M)$  is the probability of a d-dimensional standard normal random variable appears in the ball with radius  $M = \frac{1}{8} \frac{\lambda_{min}^2}{\sqrt{\lambda_{max}}}$  and  $C_{min} = \lambda_{min} \left( \frac{1}{n} \sum_{i=1} \sigma(\mathbf{w}^{*T} \mathbf{x}^i) (1 - \sigma(\mathbf{w}^{*T} \mathbf{x}^i)) \mathbf{x}^i (\mathbf{x}^i)^T \right)$ .

*Proof.* In this proof, we use  $\Sigma$  and  $\mathbf{m}$  to denote  $\Sigma^0$  and  $\mathbf{m}^0$ , and use  $\mathbf{x}_i, y_i$  to denote  $\mathbf{x}^i$  and  $y^i$  for notation simplicity.

Let  $f(\mathbf{w}) = g(\mathbf{w}) + h(\mathbf{w})$ , where

$$g(\mathbf{w}) = \frac{1}{2}(\mathbf{w} - \mathbf{m})^T \Sigma^{-1}(\mathbf{w} - \mathbf{m}),$$

and

$$h(\mathbf{w}) = -\mathbb{E}_{\mathbf{y} \sim \mathcal{B}(\mathcal{D}^n, \mathbf{w}^*)} \left[ \frac{1}{n} \sum_{i=1}^n \log \sigma(y_i \mathbf{w}^T \mathbf{x}_i) \right].$$

Then based on mean value theorem we have

$$h(\mathbf{w}) - h(\mathbf{w}^*) = (\mathbf{w} - \mathbf{w}^*)^T \nabla h(\mathbf{w}^*) + \frac{1}{2}(\mathbf{w} - \mathbf{w}^*)^T H(\mathbf{w}^* + \eta(\mathbf{w} - \mathbf{w}^*))(\mathbf{w} - \mathbf{w}^*),$$

where  $H$  is the Hessian of  $h$ .

To analyze the first and second order terms, we use a similar technique adopted in [1]. For the first order term, we have

$$\begin{aligned} \nabla h(\mathbf{w}^*) &= \mathbb{E}_{\mathbf{y} \sim \mathcal{B}(\mathcal{D}^n, \mathbf{w}^*)} \left[ \frac{1}{n} \sum_{i=1}^n (1 - \sigma(y_i \mathbf{w}^T \mathbf{x}_i)) y_i \mathbf{x}_i \right] \\ &= \frac{1}{n} \sum_{i=1}^n \left( (1 - \sigma(\mathbf{w}^T \mathbf{x}_i)) \sigma(\mathbf{w}^T \mathbf{x}_i) - (1 - \sigma(-\mathbf{w}^T \mathbf{x}_i)) (1 - \sigma(\mathbf{w}^T \mathbf{x}_i)) \right) \mathbf{x}_i = 0. \end{aligned}$$

For the second order term, we have

$$\begin{aligned} &H(\mathbf{w}^* + \eta(\mathbf{w} - \mathbf{w}^*)) \\ &= \mathbb{E}_{\mathbf{y} \sim \mathcal{B}(\mathcal{D}^n, \mathbf{w}^*)} \left( \frac{1}{n} \sum_{i=1}^n \sigma(y_i (\mathbf{w}^* + \eta(\mathbf{w} - \mathbf{w}^*))^T \mathbf{x}_i) \left( 1 - \sigma(y_i (\mathbf{w}^* + \eta(\mathbf{w} - \mathbf{w}^*))^T \mathbf{x}_i) \right) \mathbf{x}_i \mathbf{x}_i^T \right) \\ &= \frac{1}{n} \sum_{i=1}^n \sigma((\mathbf{w}^* + \eta(\mathbf{w} - \mathbf{w}^*))^T \mathbf{x}_i) \left( 1 - \sigma((\mathbf{w}^* + \eta(\mathbf{w} - \mathbf{w}^*))^T \mathbf{x}_i) \right) \mathbf{x}_i \mathbf{x}_i^T \\ &= \frac{1}{n} \sum_{i=1}^n J_i(\mathbf{w}, \eta) \mathbf{x}_i \mathbf{x}_i^T, \end{aligned}$$

where  $J_i(\mathbf{w}, \eta) = \sigma((\mathbf{w}^* + \eta(\mathbf{w} - \mathbf{w}^*))^T \mathbf{x}_i) \left( 1 - \sigma((\mathbf{w}^* + \eta(\mathbf{w} - \mathbf{w}^*))^T \mathbf{x}_i) \right)$ .

We expand  $J_i(\mathbf{w}, \eta)$  to its first order and use mean value theorem again,

$$\begin{aligned} |J_i(\mathbf{w}, \eta) - J_i(\mathbf{w}^*, \eta)| &= |\eta(\mathbf{w} - \mathbf{w}^*)^T \mathbf{x}_i \sigma'| \\ &\leq |\sigma(1 - \sigma)(1 - 2\sigma)| \|\mathbf{w} - \mathbf{w}^*\|_2 \\ &\leq \|\mathbf{w} - \mathbf{w}^*\|_2, \end{aligned}$$

where we omit the dependence of  $\sigma$  on  $(\mathbf{w}^* + \eta(\mathbf{w} - \mathbf{w}^*))^T \mathbf{x}_i$  for simplicity and use the fact  $\sigma \in (0, 1)$ .

Combining the first order and second order analysis and denoting  $\|\mathbf{w} - \mathbf{w}^*\|_2$  as  $R$ , we have

$$\begin{aligned} h(\mathbf{w}) - h(\mathbf{w}^*) &\geq \frac{1}{2} \|\mathbf{w} - \mathbf{w}^*\|_2^2 \lambda_{\min} \left( H(\mathbf{w}^* + \eta(\mathbf{w} - \mathbf{w}^*)) \right) \\ &\geq \frac{1}{2} R^2 \lambda_{\min} \left( \frac{1}{n} \sum_{i=1}^n \sigma(\mathbf{x}_i^T \mathbf{w}^*) (1 - \sigma(\mathbf{x}_i^T \mathbf{w}^*)) \mathbf{x}_i \mathbf{x}_i^T - R \right) \\ &\geq \frac{1}{2} C_{\min} R^2 - \frac{1}{2} R^3, \end{aligned}$$

where we use the fact that  $\|\mathbf{x}_i\|_2 \leq 1$  and use  $C_{\min}$  to denote  $\lambda_{\min} \left( \frac{1}{n} \sum_{i=1}^n \sigma(\mathbf{x}_i^T \mathbf{w}^*) (1 - \sigma(\mathbf{x}_i^T \mathbf{w}^*)) \mathbf{x}_i \mathbf{x}_i^T \right)$ .

On the other hand, for  $g(\mathbf{w})$  we have

$$\begin{aligned} g(\mathbf{w}) - g(\mathbf{w}^*) &= (\mathbf{w} - \mathbf{w}^*)^T \boldsymbol{\Sigma}^{-1} (\mathbf{w}^* - \mathbf{m}) + \frac{1}{2} (\mathbf{w} - \mathbf{w}^*)^T \boldsymbol{\Sigma}^{-1} (\mathbf{w} - \mathbf{w}^*) \\ &\geq -DR \sqrt{\lambda_{\max}(\boldsymbol{\Sigma}^{-1})} + \frac{1}{2} \lambda_{\min}(\boldsymbol{\Sigma}^{-1}) R^2, \end{aligned}$$

where  $D = \|\boldsymbol{\Sigma}^{-\frac{1}{2}}(\mathbf{w}^* - \mathbf{m})\|_2$ .

Now define function  $F(\Delta)$  as  $F(\Delta) = f(\mathbf{w}^* + \Delta) - f(\mathbf{w}^*)$ , then we have

$$F(\Delta) = g(\mathbf{w}) - g(\mathbf{w}^*) + h(\mathbf{w}^n) - h(\mathbf{w}^*) \geq -\sqrt{\lambda_{\max}(\boldsymbol{\Sigma}^{-1})} DR + \frac{1}{2} \lambda_{\min}(\boldsymbol{\Sigma}^{-1}) R^2 + \frac{1}{2} C_{\min} R^2 - \frac{1}{2} R^3.$$

From now on we will use the simplified symbols  $\lambda_{\max}$  and  $\lambda_{\min}$  instead of  $\lambda_{\min}(\boldsymbol{\Sigma}^{-1})$  and  $\lambda_{\max}(\boldsymbol{\Sigma}^{-1})$ . It is easy to check that in the case when

$$D \leq \frac{1}{8} \frac{\lambda_{\min}^2}{\sqrt{\lambda_{\max}}}, \quad (\text{A.1})$$

$F(\Delta) \geq 0$  at for all  $\Delta$  with  $\|\Delta\|_2 = \frac{1}{2}(C_{\min} + \lambda_{\min})$ .

Notice that  $F(0) = 0$  and recall that  $\mathbf{w}^n$  minimizes  $f(\mathbf{w})$  so we have

$$F(\mathbf{w}^n - \mathbf{w}^*) = f(\mathbf{w}) - f(\mathbf{w}^*) \leq 0.$$

Then based on the convexity of  $F$  we know that  $\|\mathbf{w}^n - \mathbf{w}^*\|_2 \leq \frac{1}{2}(C_{\min} + \lambda_{\min})$ , otherwise the values of  $F$  at 0,  $\mathbf{w}^n - \mathbf{w}^*$  and the intersection between the all  $\|\Delta\|_2 = \frac{1}{2}(C_{\min} + \lambda_{\min})$  and line from 0 to  $\mathbf{w}^n - \mathbf{w}^*$  form a concave pattern, which is contradictory.

Now we start to calculate the probability for Eq. (A.1) to hold. Recall that  $\mathbf{w}^*$  has a prior distribution  $\mathbf{w}^* \sim \mathcal{N}(\mathbf{m}, \boldsymbol{\Sigma})$ . Then by denoting the right hand side of Eq. (A.1) as  $M$ , we have

$$\begin{aligned} &\Pr\left(D \leq \frac{1}{8} \frac{\lambda_{\min}^2}{\sqrt{\lambda_{\max}}}\right) \\ &= \int_{\|\boldsymbol{\Sigma}^{-\frac{1}{2}}(\mathbf{a} - \mathbf{m})\| \leq M} (2\pi)^{-\frac{d}{2}} |\boldsymbol{\Sigma}|^{-\frac{1}{2}} \exp\left(-\frac{1}{2}(\mathbf{a} - \mathbf{m})^T \boldsymbol{\Sigma}^{-1} (\mathbf{a} - \mathbf{m})\right) d\mathbf{a} \\ &= \int_{\|\mathbf{b}\|_2 \leq M} (2\pi)^{-\frac{d}{2}} \exp\left(-\frac{1}{2}\mathbf{b}^T \mathbf{b}\right) d\mathbf{b}, \end{aligned}$$

which is the probability of a d-dimension standard normal random variable appears in the ball with radius  $M$ ,  $P_d(M)$ . This completes the proof.  $\square$

## References

- [1] Pradeep Ravikumar, Martin J Wainwright, John D Lafferty, et al. High-dimensional ising model selection using 1-regularized logistic regression. *The Annals of Statistics*, 38(3):1287–1319, 2010.
